# Supplementary material
Source: PubMed Central journal article supplement (PMC3161559)
Supplement: 1110176108_pnas.201110176SI.pdf [file 1110176108_pnas.201110176SI.pdf]

# Supporting Information

Stanish and Levine 10.1073/pnas.1110176108

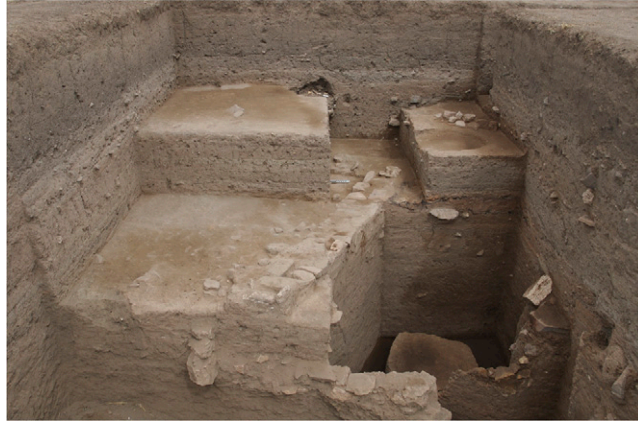

**Fig. S1.** Excavated unit showing distinct levels. The burn event is contemporary with the wall in the center of the unit.

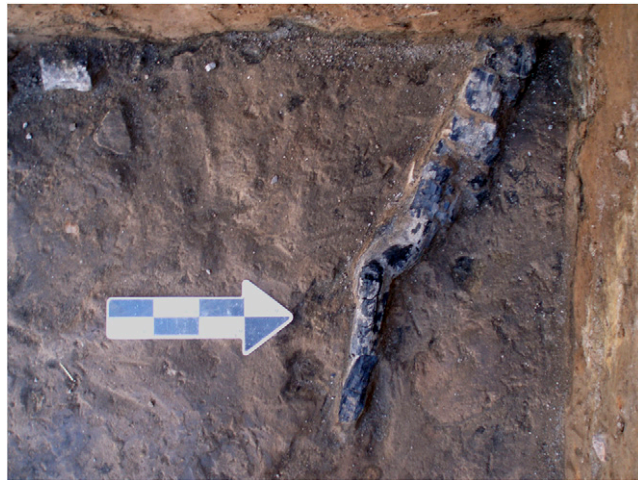

**Fig. S2.** Burnt wooden post in situ in excavation unit.

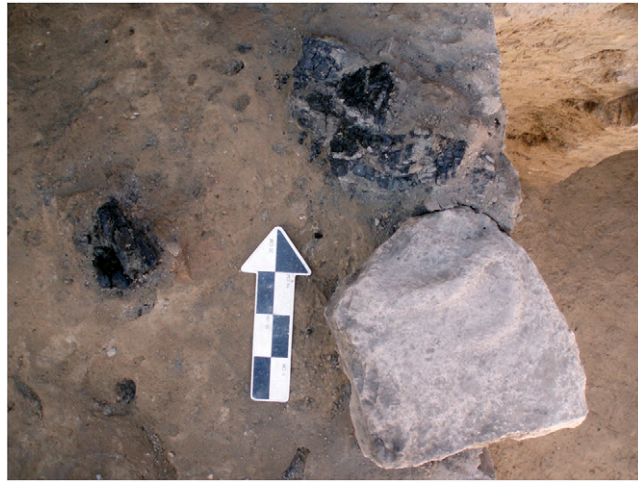

Fig. 53. Burnt wooden post in situ with carved stone in excavation unit.

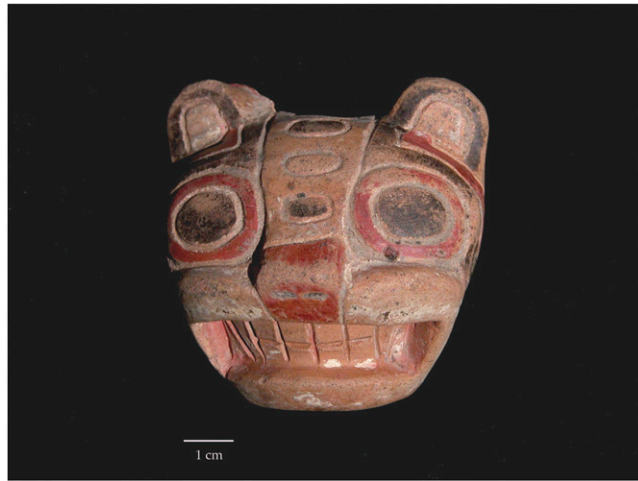

Fig. 54. Classic Pukara ceramic feline face found in situ at the base of the burn episode.
